# Supplementary material for: Synthesis of Novel 2-(Isopropylamino)thiazol-4(5H)-one Derivatives and Their Inhibitory Activity of 11β-HSD1 and 11β-HSD2 in Aspect of Carcinogenesis Prevention
Source: PubMed Central journal article supplement (PMC7570983; doi:10.3390/molecules25184233), 2020-09-15
Supplement: molecules-25-04233-s001.pdf [file molecules-25-04233-s001.pdf]

## Supplementary information

### Synthesis of novel 2-(isopropylamino)thiazol-4(5*H*)-one derivatives and their inhibitory activity of 11 $\beta$ -HSD1 and 11 $\beta$ -HSD2 in aspect of carcinogenesis prevention.

Daria Kupczyk <sup>1,\*,#</sup>, Renata Studzińska <sup>2,\*,#</sup>, Rafał Bilski <sup>1</sup>, Szymon Baumgart <sup>2</sup>, Renata Kołodziejska <sup>1</sup> and Alina Woźniak<sup>1</sup>

<sup>1</sup> Nicolaus Copernicus University in Toruń, Collegium Medicum in Bydgoszcz, Faculty of Medicine, Department of Medical Biology and Biochemistry, Karłowicza 24, 85–092 Bydgoszcz, Poland; dariak@cm.umk.pl

<sup>2</sup> Nicolaus Copernicus University in Toruń, Collegium Medicum in Bydgoszcz, Faculty of Pharmacy, Department of Organic Chemistry, Jurasza 2, 85–089 Bydgoszcz, Poland; rstud@cm.umk.pl

\* Correspondence: dariak@cm.umk.pl (D.K.); rstud@cm.umk.pl (R.S.)

# Renata Studzińska and Daria Kupczyk have equally contributed to the present paper and should be considered to be the first authors



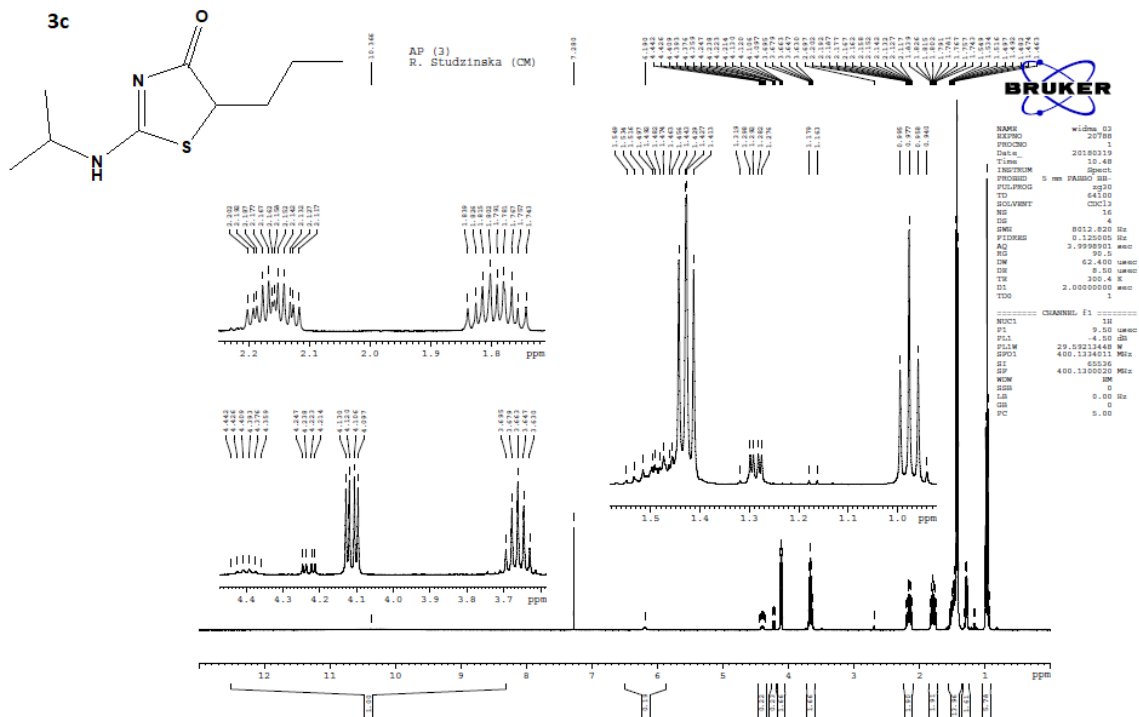

S1.3. <sup>1</sup>H NMR spectra of compound **3c**

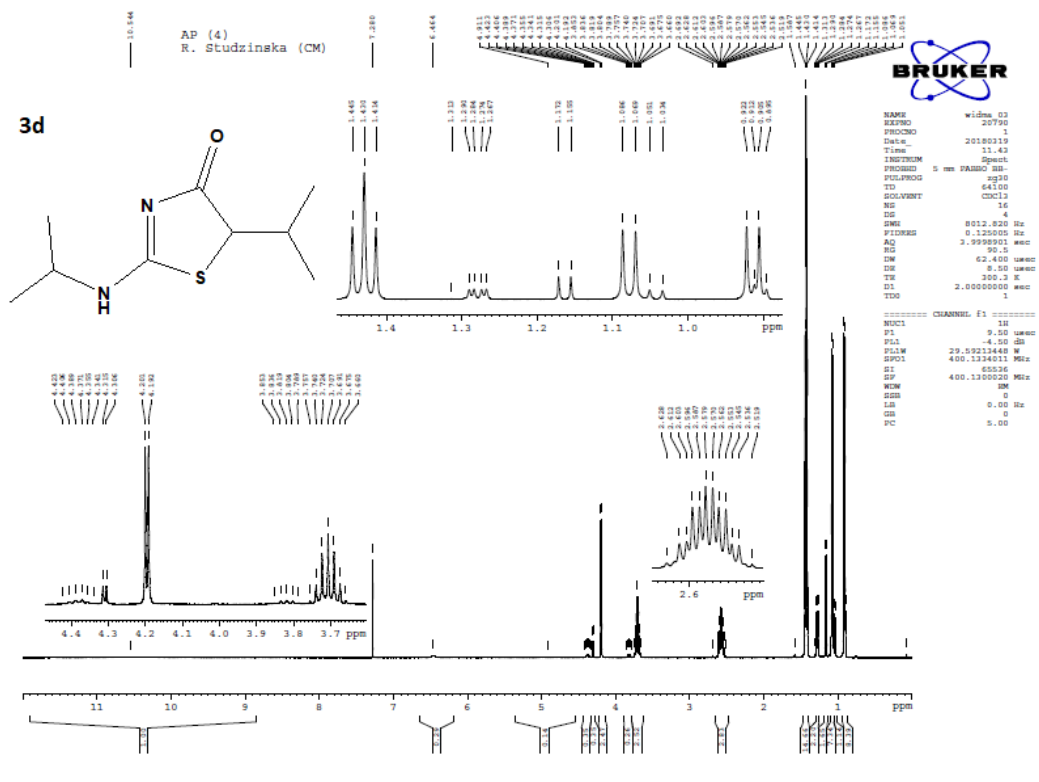

S1.4. <sup>1</sup>H NMR spectra of compound **3d**



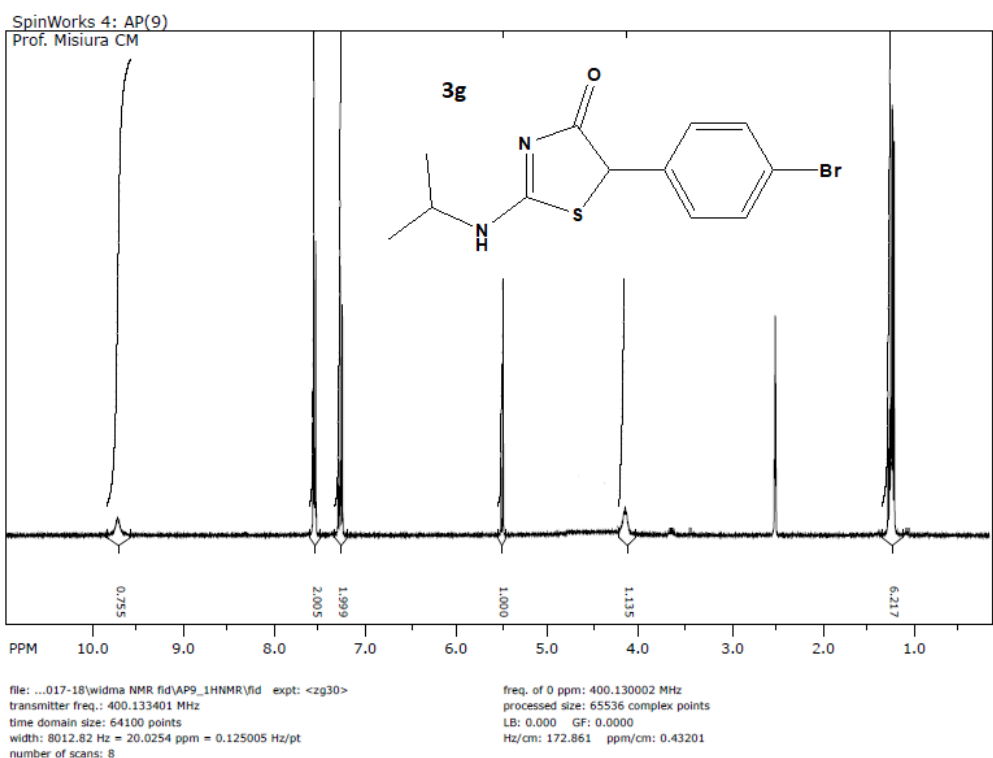

S1.7. <sup>1</sup>H NMR spectra of compound **3g**

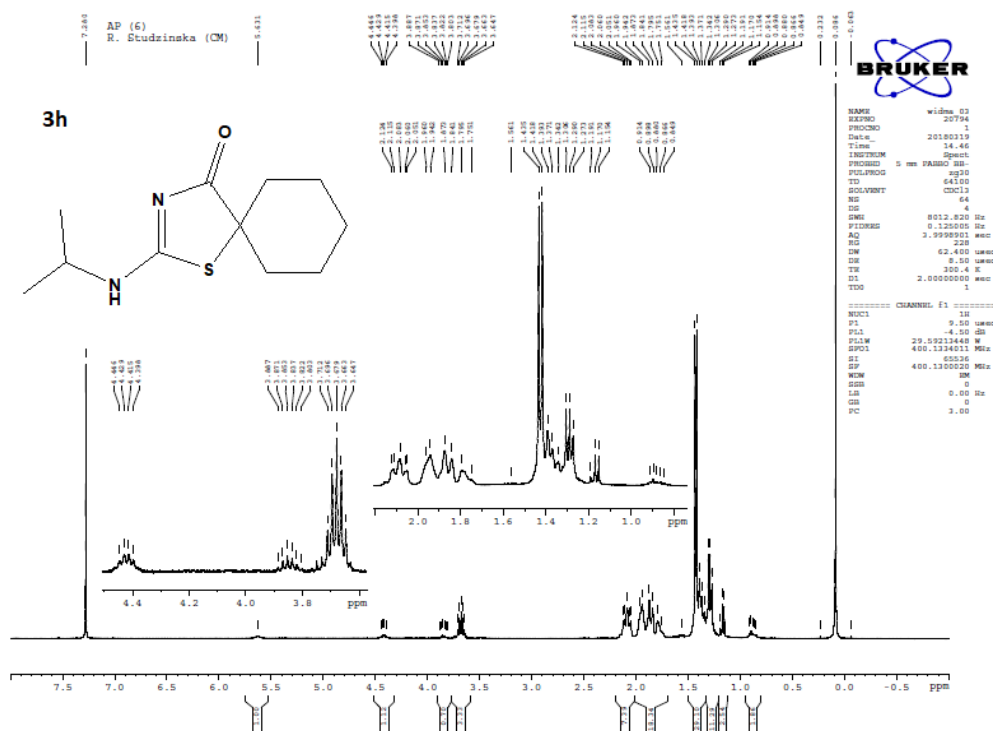

S1.8. <sup>1</sup>H NMR spectra of compound **3h**



## S2. <sup>13</sup>C NMR spectra of compounds **3a** – **3i**

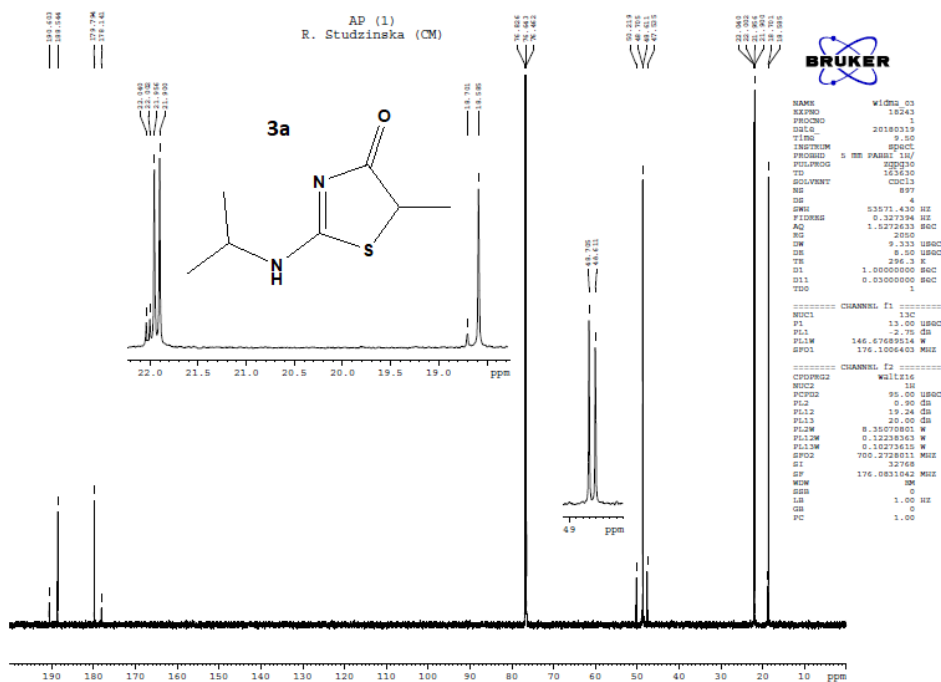

### S2.1. <sup>13</sup>C NMR spectra of compounds **3a**

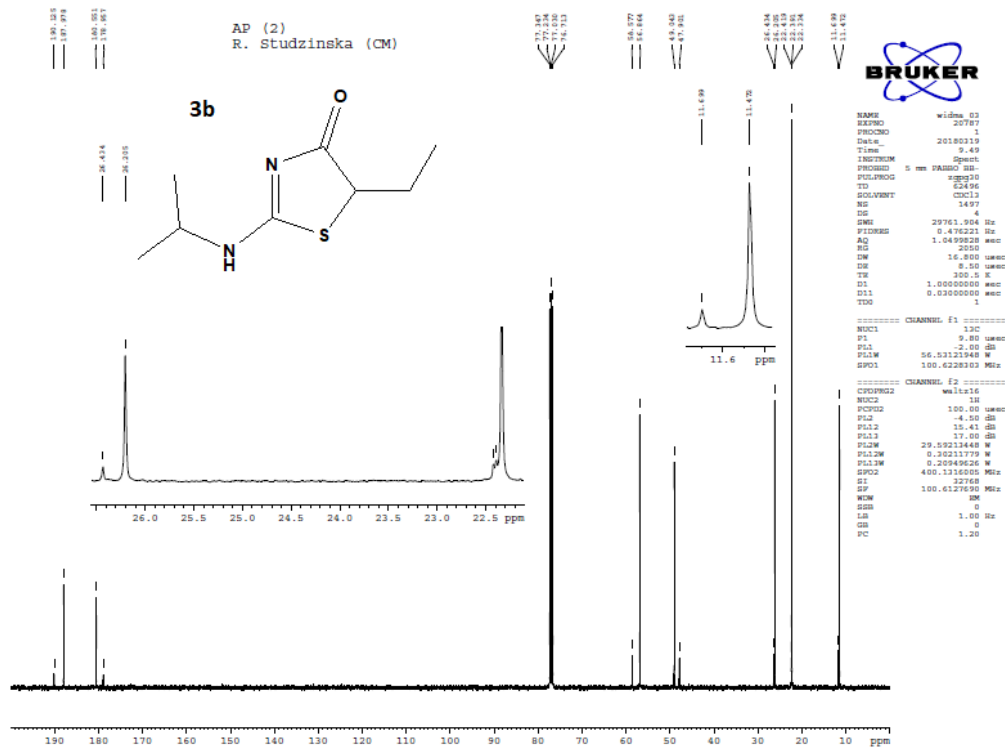

### S2.2. <sup>13</sup>C NMR spectra of compounds **3b**





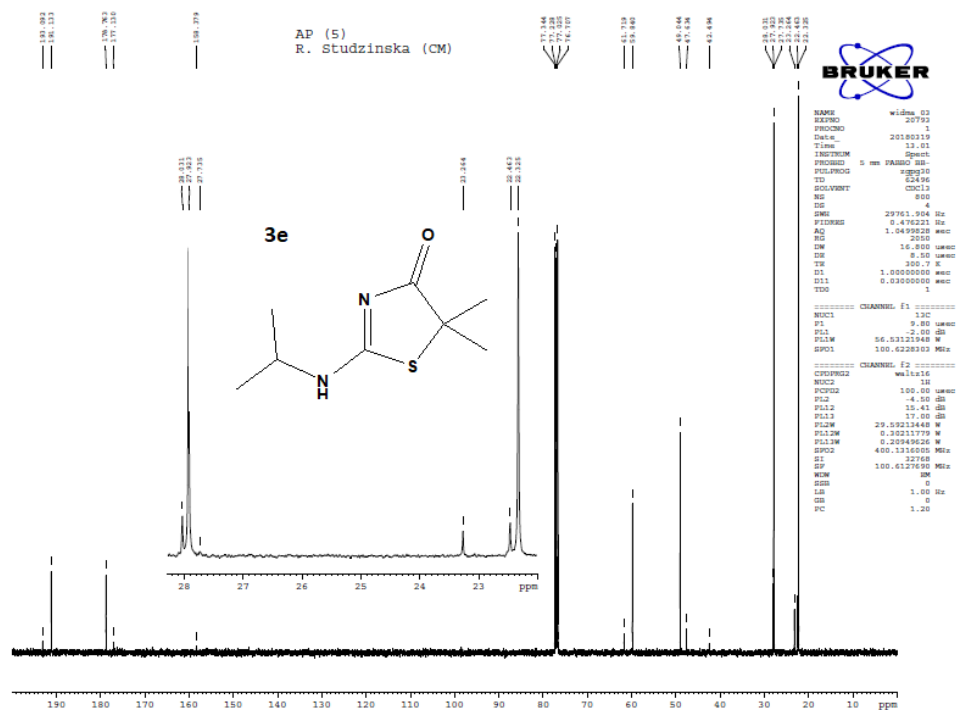

## S2.5. <sup>13</sup>C NMR spectra of compounds **3e**

SpinWorks 4: AP(8)

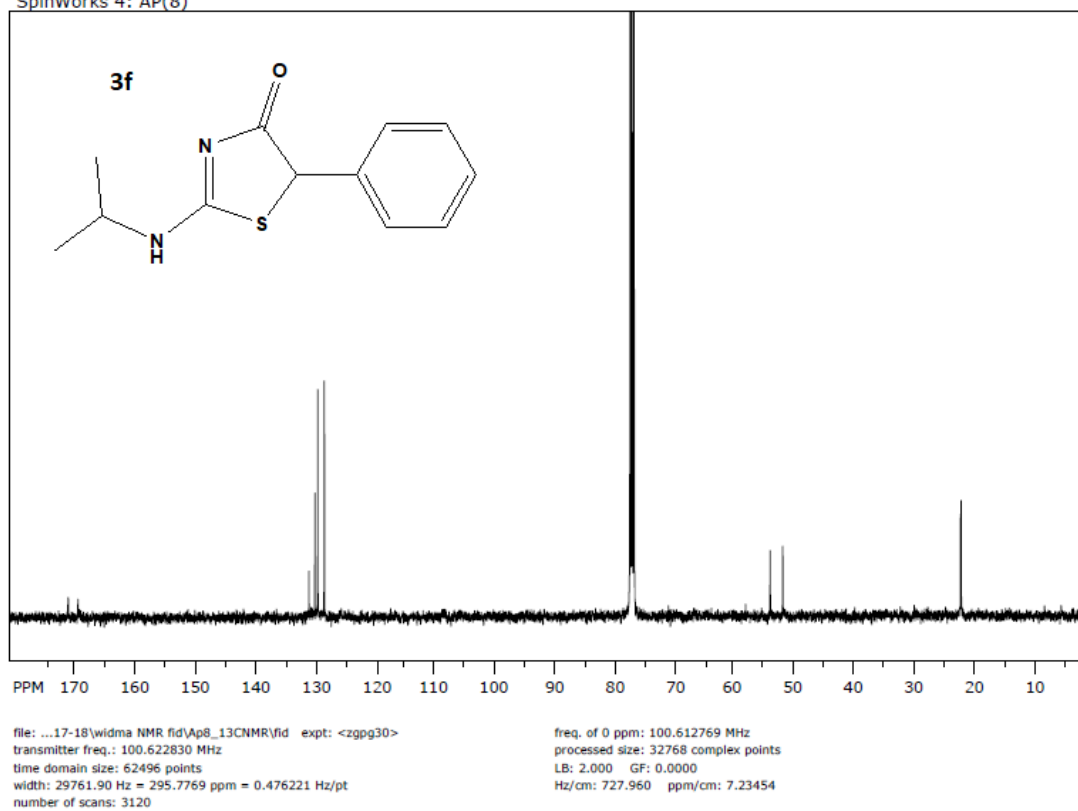

## S2.6. <sup>13</sup>C NMR spectra of compounds **3f**

SpinWorks 4: AP(9)  
R. Studzinska CM UMK

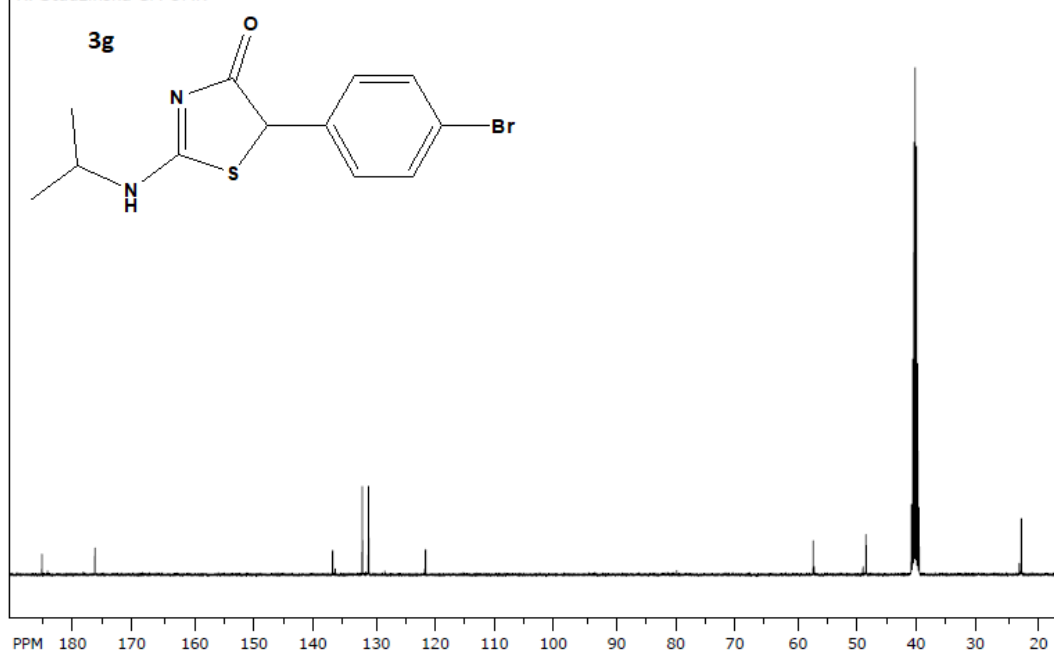

file: ...17-18\widma NMR fid\AP9\_13CNMR\fid exp: <zpgg30>  
transmitter freq.: 100.622830 MHz  
time domain size: 62496 points  
width: 29761.90 Hz = 295.7769 ppm = 0.476221 Hz/pt  
number of scans: 1600

freq. of 0 ppm: 100.612769 MHz  
processed size: 32768 complex points  
LB: 1.000 GF: 0.0000  
Hz/cm: 704.305 ppm/cm: 6.99945

## S2.7. <sup>13</sup>C NMR spectra of compounds **3g**

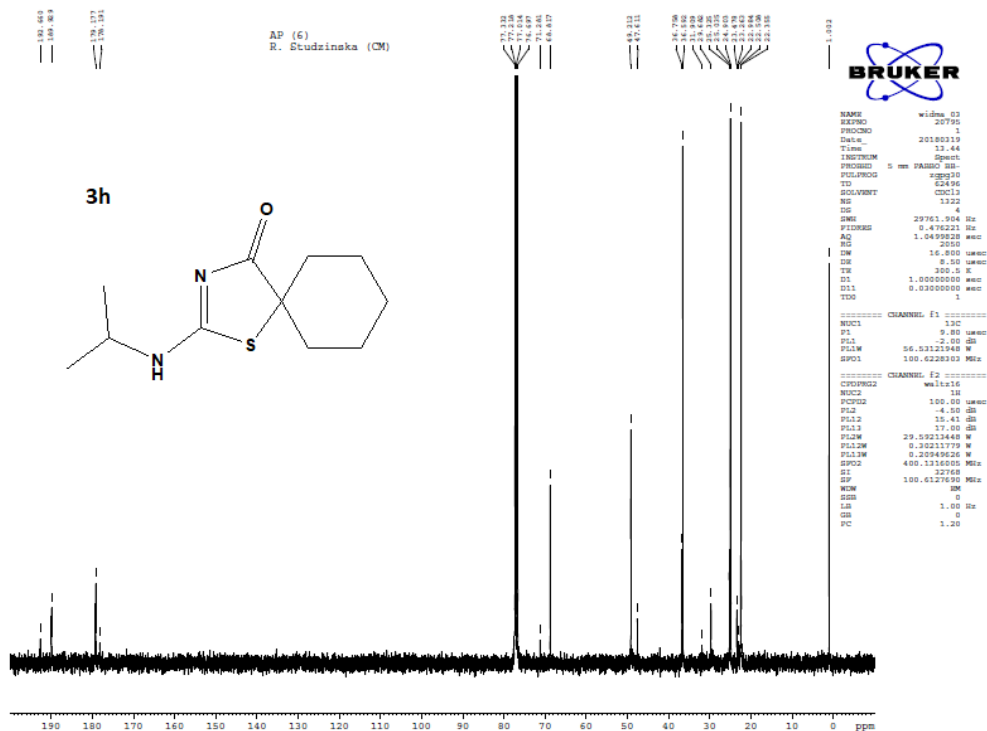

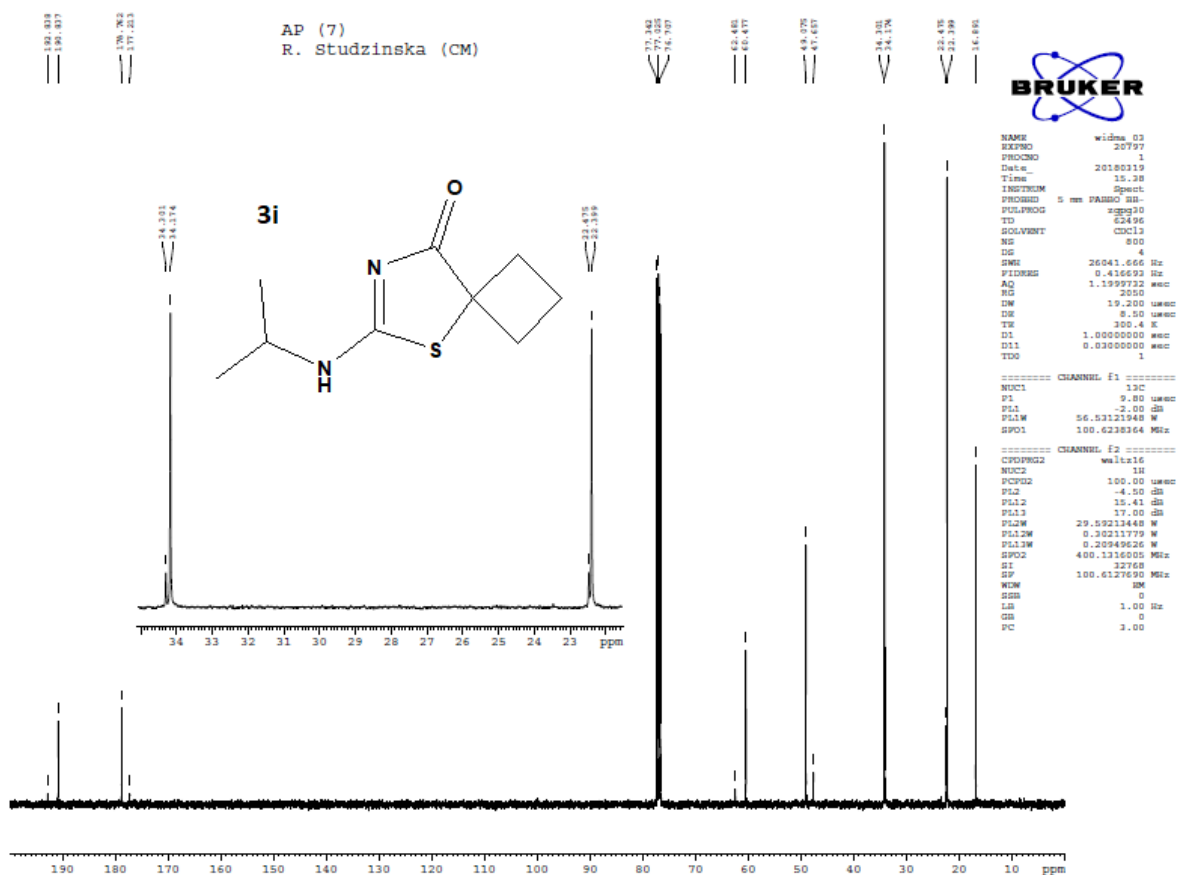

S2.9.  $^{13}\text{C}$  NMR spectra of compounds **3i**

### S3. HRMS spectra of compounds **3a – 3i**

#### Elemental Composition Report

##### Single Mass Analysis

Tolerance = 10.0 PPM / DBE: min = -1.5, max = 50.0

Element prediction: Off

Number of isotope peaks used for i-FIT = 3

Monoisotopic Mass, Even Electron Ions

62 formula(e) evaluated with 1 results within limits (up to 50 closest results for each mass)

Elements Used:

C: 0-12 H: 0-20 N: 0-3 O: 0-2 S: 0-2

R.Studzinska

180515\_AP\_17 (0.194) Cm (7:8-16:29)

1: TOF MS ES+  
2.66e+006

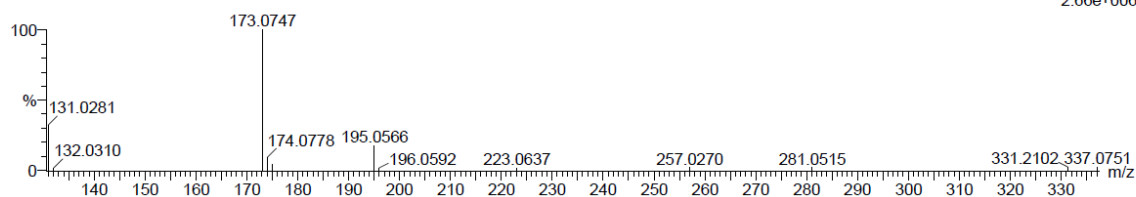

Minimum: -1.5  
Maximum: 15.0 10.0 50.0

| Mass     | Calc. Mass | mDa  | PPM  | DBE | i-FIT | Norm | Conf(%) | Formula       |
|----------|------------|------|------|-----|-------|------|---------|---------------|
| 173.0747 | 173.0749   | -0.2 | -1.2 | 2.5 | 27.1  | n/a  | n/a     | C7 H13 N2 O S |

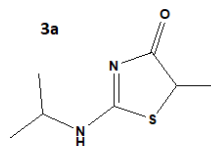

Page 1

#### S3.1. HRMS spectra of compounds **3a**

#### Elemental Composition Report

##### Single Mass Analysis

Tolerance = 10.0 PPM / DBE: min = -1.5, max = 50.0

Element prediction: Off

Number of isotope peaks used for i-FIT = 3

Monoisotopic Mass, Even Electron Ions

52 formula(e) evaluated with 1 results within limits (up to 50 closest results for each mass)

Elements Used:

C: 0-10 H: 0-20 N: 0-3 O: 0-2 S: 0-2

R.Studzinska

180515\_AP\_27 (0.194) Cm (7:9-18:29)

1: TOF MS ES+  
9.75e+006

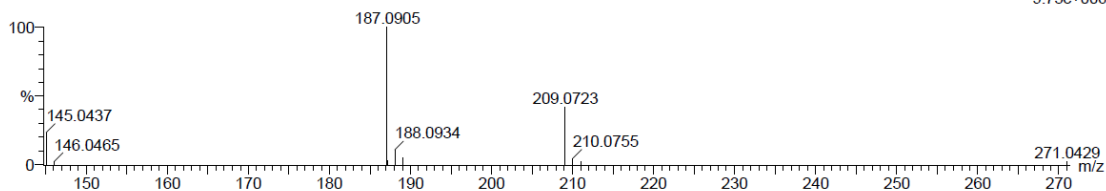

Minimum: -1.5  
Maximum: 15.0 10.0 50.0

| Mass     | Calc. Mass | mDa | PPM | DBE | i-FIT | Norm | Conf(%) | Formula       |
|----------|------------|-----|-----|-----|-------|------|---------|---------------|
| 187.0905 | 187.0905   | 0.0 | 0.0 | 2.5 | 54.1  | n/a  | n/a     | C8 H15 N2 O S |

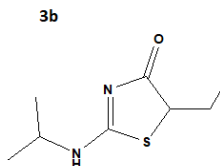

Page 1

#### S3.2. HRMS spectra of compounds **3b**

## Elemental Composition Report

### Single Mass Analysis

Tolerance = 10.0 PPM / DBE: min = -1.5, max = 50.0

Element prediction: Off

Number of isotope peaks used for i-FIT = 3

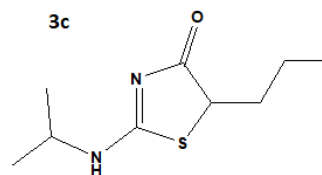

Monoisotopic Mass, Even Electron Ions

65 formula(e) evaluated with 1 results within limits (up to 50 closest results for each mass)

Elements Used:

C: 0-15 H: 0-20 N: 0-3 O: 0-2 S: 0-2

R.Studzinska

180515\_AP\_3 7 (0.194) Cm (6:9-15:30)

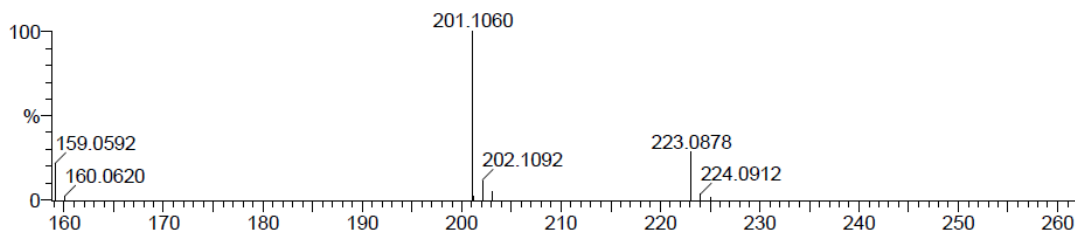

Minimum: -1.5  
Maximum: 15.0 10.0 50.0

| Mass     | Calc. Mass | mDa  | PPM  | DBE | i-FIT | Norm | Conf(%) | Formula       |
|----------|------------|------|------|-----|-------|------|---------|---------------|
| 201.1060 | 201.1062   | -0.2 | -1.0 | 2.5 | 56.2  | n/a  | n/a     | C9 H17 N2 O S |

## S3.3. HRMS spectra of compounds **3c**

### Elemental Composition Report

#### Single Mass Analysis

Tolerance = 10.0 PPM / DBE: min = -1.5, max = 50.0

Element prediction: Off

Number of isotope peaks used for i-FIT = 3

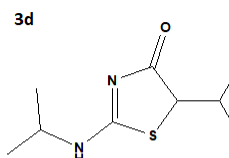

Page 1

Monoisotopic Mass, Even Electron Ions

65 formula(e) evaluated with 1 results within limits (up to 50 closest results for each mass)

Elements Used:

C: 0-15 H: 0-20 N: 0-3 O: 0-2 S: 0-2

R.Studzinska

180515\_AP\_4 7 (0.194) Cm (6:9-15:30)

1: TOF MS ES+  
1.29e+007

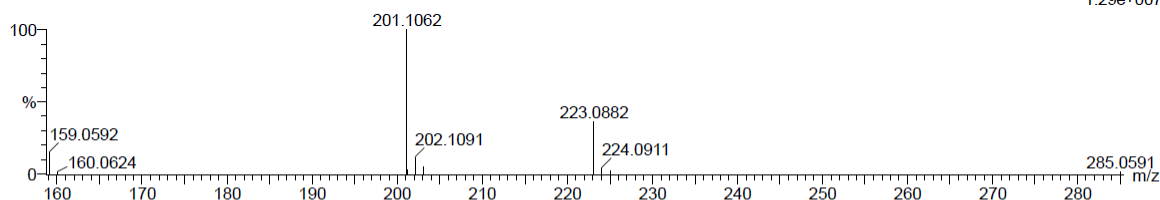

Minimum: -1.5  
Maximum: 15.0 10.0 50.0

| Mass     | Calc. Mass | mDa | PPM | DBE | i-FIT | Norm | Conf(%) | Formula       |
|----------|------------|-----|-----|-----|-------|------|---------|---------------|
| 201.1062 | 201.1062   | 0.0 | 0.0 | 2.5 | 54.4  | n/a  | n/a     | C9 H17 N2 O S |

## S3.4. HRMS spectra of compounds **3d**

## Elemental Composition Report

Page 1

### Single Mass Analysis

Tolerance = 10.0 PPM / DBE: min = -1.5, max = 50.0

Element prediction: Off

Number of isotope peaks used for i-FIT = 3

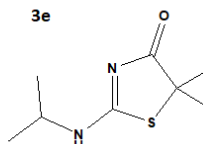

Monoisotopic Mass, Even Electron Ions

66 formula(e) evaluated with 1 results within limits (up to 50 closest results for each mass)

Elements Used:

C: 0-15 H: 0-20 N: 0-3 O: 0-2 S: 0-2

R.Studzinska

180515\_AP\_5 7 (0.194) Cm (7:8-(1:4+14:29))

1: TOF MS ES+  
4.48e+006

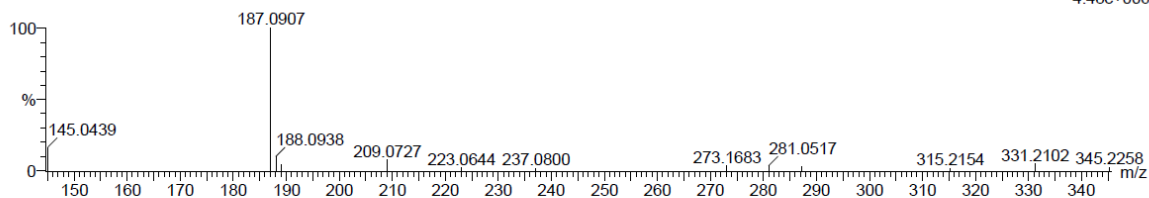

Minimum: -1.5  
Maximum: 15.0 10.0 50.0

| Mass     | Calc. Mass | mDa | PPM | DBE | i-FIT | Norm | Conf(%) | Formula       |
|----------|------------|-----|-----|-----|-------|------|---------|---------------|
| 187.0907 | 187.0905   | 0.2 | 1.1 | 2.5 | 30.7  | n/a  | n/a     | C8 H15 N2 O S |

## S3.5. HRMS spectra of compounds **3e**

## Elemental Composition Report

Page 1

### Single Mass Analysis

Tolerance = 10.0 PPM / DBE: min = -1.5, max = 50.0

Element prediction: Off

Number of isotope peaks used for i-FIT = 3

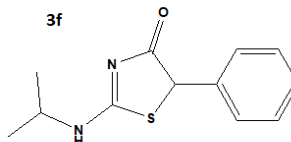

Monoisotopic Mass, Even Electron Ions

51 formula(e) evaluated with 1 results within limits (up to 50 closest results for each mass)

Elements Used:

C: 0-15 H: 0-20 N: 0-3 O: 0-2 S: 0-2

R.Studzinska

180515\_AP\_8 7 (0.194) Cm (6:9-(1:3+12:30))

1: TOF MS ES+  
7.53e+005

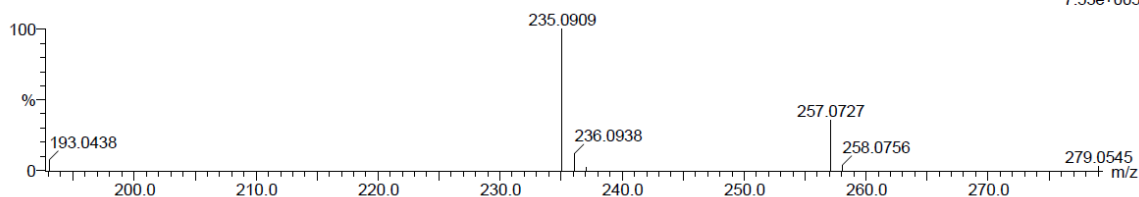

Minimum: -1.5  
Maximum: 15.0 10.0 50.0

| Mass     | Calc. Mass | mDa | PPM | DBE | i-FIT | Norm | Conf(%) | Formula        |
|----------|------------|-----|-----|-----|-------|------|---------|----------------|
| 235.0909 | 235.0905   | 0.4 | 1.7 | 6.5 | 34.2  | n/a  | n/a     | C12 H15 N2 O S |

## S3.6. HRMS spectra of compounds **3f**

## Elemental Composition Report

Page 1

### Single Mass Analysis

Tolerance = 10.0 PPM / DBE: min = -1.5, max = 50.0

Element prediction: Off

Number of isotope peaks used for i-FIT = 3

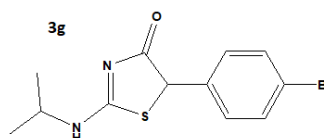

Monoisotopic Mass, Even Electron Ions

171 formula(e) evaluated with 1 results within limits (up to 50 closest results for each mass)

Elements Used:

C: 0-15 H: 0-20 N: 0-3 O: 0-2 S: 0-2 Br: 0-8

R.Studzinska  
180515\_AP\_9 7 (0.194) Cm (5:11-(1:4+13:30))

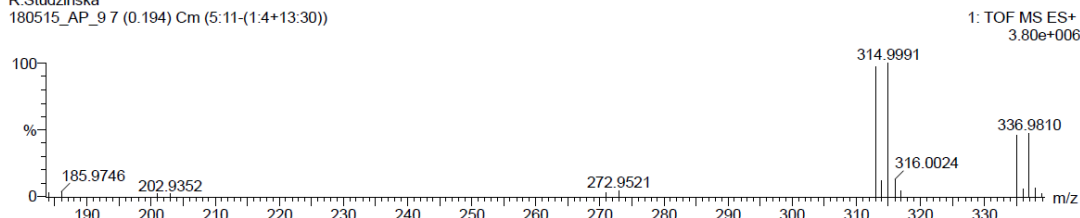

Minimum: -1.5  
Maximum: 15.0 10.0 50.0

| Mass     | Calc. Mass | mDa | PPM | DBE | i-FIT | Norm | Conf(%) | Formula           |
|----------|------------|-----|-----|-----|-------|------|---------|-------------------|
| 313.0011 | 313.0010   | 0.1 | 0.3 | 6.5 | 28.9  | n/a  | n/a     | C12 H14 N2 O S Br |

## S3.7. HRMS spectra of compounds 3g

## Elemental Composition Report

Page 1

### Single Mass Analysis

Tolerance = 10.0 PPM / DBE: min = -1.5, max = 50.0

Element prediction: Off

Number of isotope peaks used for i-FIT = 3

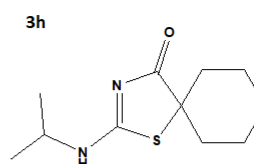

Monoisotopic Mass, Even Electron Ions

58 formula(e) evaluated with 1 results within limits (up to 50 closest results for each mass)

Elements Used:

C: 0-15 H: 0-20 N: 0-3 O: 0-2 S: 0-2

R.Studzinska  
180515\_AP\_6 7 (0.194) Cm (6:9-(15:30+1:4))

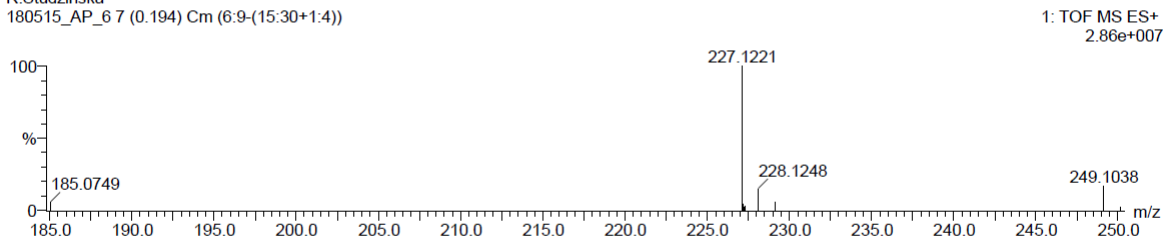

Minimum: -1.5  
Maximum: 15.0 10.0 50.0

| Mass     | Calc. Mass | mDa | PPM | DBE | i-FIT | Norm | Conf(%) | Formula        |
|----------|------------|-----|-----|-----|-------|------|---------|----------------|
| 227.1221 | 227.1218   | 0.3 | 1.3 | 3.5 | 138.6 | n/a  | n/a     | C11 H19 N2 O S |

## S3.8. HRMS spectra of compounds 3h

## Elemental Composition Report

Page 1

### Single Mass Analysis

Tolerance = 10.0 PPM / DBE: min = -1.5, max = 50.0

Element prediction: Off

Number of isotope peaks used for i-FIT = 3

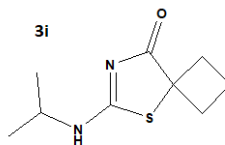

Monoisotopic Mass, Even Electron Ions

65 formula(e) evaluated with 1 results within limits (up to 50 closest results for each mass)

Elements Used:

C: 0-15 H: 0-20 N: 0-3 O: 0-2 S: 0-2

R.Studzinska

180515\_AP\_7 7 (0.194) Cm (6:9-(1:3+16:30))

1: TOF MS ES+  
1.47e+007

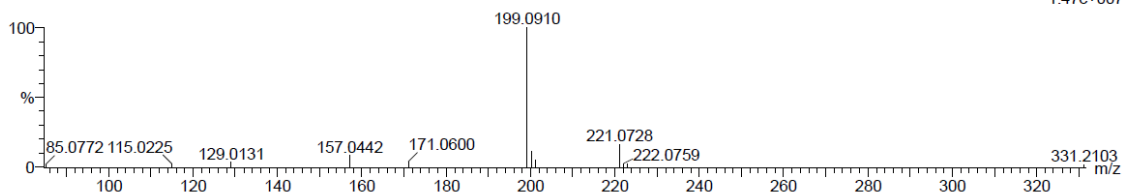

Minimum:

Maximum: 15.0 10.0 -1.5

Maximum: 50.0

| Mass     | Calc. Mass | mDa | PPM | DBE | i-FIT | Norm | Conf (%) | Formula       |
|----------|------------|-----|-----|-----|-------|------|----------|---------------|
| 199.0910 | 199.0905   | 0.5 | 2.5 | 3.5 | 56.7  | n/a  | n/a      | C9 H15 N2 O S |

## S3.9. HRMS spectra of compounds 3i
